# Supplementary material for: Emergence of nosocomial associated opportunistic pathogens in the gut microbiome after antibiotic treatment
Source: Antimicrob Resist Infect Control. 2021 Feb 15;10:36. doi: 10.1186/s13756-021-00903-0 (PMC7885457; doi:10.1186/s13756-021-00903-0)
Supplement: Supplementary file 1 — Additional file 1: Table 1. Descriptive statistics of data processed by the analysis pipeline. For each sample in each cohort, the number of basepairs (BPs) in assembled contigs, the number of reads mapped to scaffolds, the number of predicted genes on scaffolds, and number of scaffolds classified into each of the three categories (novel, known, divergent) are given. [file 13756_2021_903_MOESM1_ESM.xlsx]

## Sheet: supp1_062020
		Total BPs of scaffolds assembled				Reads mapping to scaffolds				Predicted genes on scaffolds				Scaffolds
Cohort	Sample	Novel	Divergent	Known	Total	Novel	Divergent	Known	Total	Novel	Divergent	Known	Total	Novel	Divergent	Known	Total
Control	1	84582324	79591802	37981512	202155638	9366350	8145584	2860846	20372780	116678	95839	54051	266568	43908	32067	28761	104736
Control	2	72000132	74896216	39470468	186366816	7232982	7176728	4368928	18778638	104887	93005	56536	254428	43025	33967	30848	107840
Control	3	71785936	75364342	36515524	183665802	5237209	5576134	4010496	14823839	104469	92545	50699	247713	42339	33306	25298	100943
Average Control		7.61228e+07	7.66175e+07	37989168	1.90729e+08	7278847	6.96615e+06	3.74676e+06	1.79918e+07	108678	93796.3	53762	256236	43090.7	33113.3	28302.3	104506
Ampicillin	1	713560	1961092	42185	2716837	192744	820436	1249725	2262905	1795	4856	91	6742	1035	3078	67	4180
Ampicillin	2	1624730	779134	218819	2622683	36560	47521	906767	990848	2911	1479	385	4775	1744	966	317	3027
Ampicillin	3	76972	2003969	1235089	3316030	6253	2394912	785126	3186291	254	6634	2199	9087	98	3277	1856	5231
Average Ampicillin		805087	1.5814e+06	498698	2.88518e+06	78519	1087623	980539	2.14668e+06	1653.33	4323	891.667	6868	959	2440.33	746.667	4146
Ciprofloxacin	1	198581	2381725	1559735	4140041	19874	226220	2060998	2307092	388	8087	2682	11157	76	3919	2274	6269
Ciprofloxacin	2	99186	4596082	4950075	9645343	11804	1576843	3469447	5058094	303	15291	6481	22075	123	7158	3966	11247
Ciprofloxacin	3	56547	3144105	1479607	4680259	2856	122893	1875506	2001255	188	11373	2762	14323	75	5320	2260	7655
Average Ciprofloxacin		118105	3.37397e+06	2663139	6.15521e+06	11511.3	641985	2.46865e+06	3122147	293	11583.7	3975	15851.7	91.3333	5465.67	2833.33	8390.33
Fosfomycin	1	192303	412797	18775878	19380978	64315	227900	34661142	34953357	300	453	15358	16111	56	84	1434	1574
Fosfomycin	2	122353	554057	19372493	20048903	126948	289964	26792877	27209789	190	650	16287	17127	44	145	2035	2224
Fosfomycin	3	138494	177286	14682706	14998486	30889	70246	69870209	69971344	249	317	12026	12592	92	193	1248	1533
Average Fosfomycin		151050	381380	17610359	18142789	74050.7	196037	4.37747e+07	44044830	246.333	473.333	14557	15276.7	64	140.667	1572.33	1777
